# Supplementary material for: Research on mechanical response of flysch tunnel construction and plastic damage mechanism of surrounding rock
Source: Research Square preprint supplement (doi:10.21203/rs.3.rs-6514374/v1), 2025-05-17
Supplement: Supplementary file 1 [file 52c33dbab69f8f085e365a13.docx]

### “Model and results data-support material.zip”

As requested, we have prepared supporting materials (code, raw data, and parameter details) to validate the numerical calculations. However, the files are substantial in size (approximately 2GB). To avoid submission system limitations, could you please advise if there is a dedicated email address to which we may send these materials directly? We are happy to submit them as per the journal’s guidelines.Because I am in Ethiopia (African country), the network condition is very poor!
